# Supplementary material for: Equol effects on AGE skin products, visceral fat, and climacteric symptoms in post-menopausal women
Source: Research Square preprint supplement (doi:10.21203/rs.3.rs-265906/v1), 2021-02-22
Supplement: Supplementary file 1 [file 8db7089e52e06063681695c0.docx]

**Table 3: Changes with regards to equol exposure categories on ad-hoc analysis for visceral fat and advanced glycation end products**

|  | Equol intervention group | | Control group | | p-value |
| --- | --- | --- | --- | --- | --- |
| Equol producer status | Equol producer | Equol non-producer | Equol producer | Equol non-producer |  |
| Equol exposure category | 1) both intrinsic and extrinsic equol exposure | 2) exclusively extrinsic equol exposure | 3) exclusively intrinsic equol exposure | 4) no equol exposure |  |
| Visceral fat |  |  |  |  | **0.023** |
| Remained normal or improved | 3 (100%) | 13 (86.7%) | 6 (85.7%) | 8 (57.1%) |  |
| Worsen | 0 (0%) | 2 (13.3%) | 1 (14.3%) | 6 (42.9%) |  |
| Advanced glycation end products | |  |  |  | **0.044** |
| Improved | 3 (75%) | 7 (35%) | 3 (37.5%) | 3 (16.7%) |  |
| Not improved | 1 (25%) | 13 (65%) | 5 (62.5%) | 15 (83.3%) |  |
| Values are shown as numbers and proportions (%).  p-values were obtained from analysis using extended Mantel-Haenszel chi square for linear trend. | | | | |  |
