# Supplementary material for: Equol effects on AGE skin products, visceral fat, and climacteric symptoms in post-menopausal women
Source: Research Square preprint supplement (doi:10.21203/rs.3.rs-265906/v1), 2021-02-22
Supplement: Supplementary file 1 [file 50e5bc36eceed69397a00bc2.docx]

**Table 2: Basic characteristics of equol intervention group and control group**

|  | All participants (57) | | Equol intervention (n=27) | | Control group (n=30) | | p-value |
| --- | --- | --- | --- | --- | --- | --- | --- |
| Age | 56 | (48-69) | 56 | (48-69) | 56 | (49-69) | 0.697a |
| Equol producers | 13 | (22.8%) | 4 | (14.8%) | 9 | (30%) | 0.172 a |
| Body-mass index | 21.4 | (16.5-27.9) | 21.2 | (16.5-26.9) | 21.5 | (18.2-27.9) | 0.455b |
| Smoking habit |  |  |  |  |  |  | 0.617 b |
| No | 54 | (94.74%) | 26 | (96.30%) | 28 | (93.33%) |  |
| Past or current smoker | 3 | (5.26%) | 1 | (3.70%) | 2 | (6.67%) |  |
| Drinking habit |  |  |  |  |  |  | **0.009** b |
| No | 20 | (10.53%) | 15 | (3.70%) | 5 | (16.67%) |  |
| Sometimes | 23 | (40.35%) | 7 | (25.93%) | 16 | (53.33%) |  |
| Everyday | 14 | (24.56%) | 5 | (18.52%) | 9 | (30.00%) |  |
| Exercise habit, at least 2 times per week | 17 | (30%) | 8 | (29.6%) | 9 | (30%) | 0.764 b |
| Current medication use |  |  |  |  |  |  |  |
| Anti-hypertensive | 8 | (14.04%) | 5 | (18.52%) | 3 | (10.00%) | 1.000 b |
| Anti-diabetes | 1 | (1.75%) | 0 | (0.00%) | 1 | (3.33%) | 1.000 b |
| Cholesterol lowering drugs | 4 | (7.02%) | 3 | (11.11%) | 1 | (3.33%) | 0.214 b |
| Continuous values are shown as medians (ranges) and categorical values are shown as numbers and proportions (%).  a: p-value for Mann-Whitney's tests  b: p-value for chi-squared tests  Statistically significant differences (p-value <0.05) are shown underlined in bold. | | | | | | | |
