# Supplementary material for: Equol effects on AGE skin products, visceral fat, and climacteric symptoms in post-menopausal women
Source: Research Square preprint supplement (doi:10.21203/rs.3.rs-265906/v1), 2021-02-22
Supplement: Supplementary file 3 [file c09aa3ef64c0741feb538055.docx]

**Table 1. Climacteric symptom rating scale by the Japan Society of Obstetrics and Gynecology**

|  | **Item** | **Score** |
| --- | --- | --- |
| Q1 | 1．Facial skin blushing and upper body (hot flashes) | Never＝0, mild＝1, moderate＝2, severe＝3 |
| Q2 | 2．Easy to sweat (sweating) | Never＝0, mild＝1, moderate＝2, severe＝3 |
| Q3 | 3．Difficulty getting to sleep (insomnia) | Never＝0, mild＝1, moderate＝2, severe＝3 |
| Q4 | 4．Difficulty staying asleep (light sleep) | Never＝0, mild＝1, moderate＝2, severe＝3 |
| Q5 | 5．Irritability | Never＝0, mild＝1, moderate＝2, severe＝3 |
| Q6 | 6．Anxiety | Never＝0, mild＝1, moderate＝2, severe＝3 |
| Q7 | 7．Often irritated by trifles (anxious trifles) | Never＝0, mild＝1, moderate＝2, severe＝3 |
| Q8 | 8．Feeling unhappy or depressed (depressive mood), | Never＝0, mild＝1, moderate＝2, severe＝3 |
| Q9 | 9．Fatigue | Never＝0, mild＝1, moderate＝2, severe＝3 |
| Q10 | 10. Eye strain | Never＝0, mild＝1, moderate＝2, severe＝3 |
| Q11 | 11．Memory problems (forgetfulness) | Never＝0, mild＝1, moderate＝2, severe＝3 |
| Q12 | 12．Dizziness | Never＝0, mild＝1, moderate＝2, severe＝3 |
| Q13 | 13．Palpitations | Never＝0, mild＝1, moderate＝2, severe＝3 |
| Q14 | 14．Chest tightness | Never＝0, mild＝1, moderate＝2, severe＝3 |
| Q15 | 15．Headache | Never＝0, mild＝1, moderate＝2, severe＝3 |
| Q16 | 16．Neck stiffness | Never＝0, mild＝1, moderate＝2, severe＝3 |
| Q17 | 17．Backache and low back pain | Never＝0, mild＝1, moderate＝2, severe＝3 |
| Q18 | 18．Joint pain | Never＝0, mild＝1, moderate＝2, severe＝3 |
| Q19 | 19．Cold hands and feet | Never＝0, mild＝1, moderate＝2, severe＝3 |
| Q20 | 20．Numbness in the legs or arms | Never＝0, mild＝1, moderate＝2, severe＝3 |
| Q21 | 21．Sensitive to sounds | Never＝0, mild＝1, moderate＝2, severe＝3 |
| Q22 | Overall improvement in symptoms (not included in the baseline questionnaire) | Worse＝-1, No change＝0, Somewhat＝1, A lot＝2 |
